# Supplementary material for: Hidden Species Diversity was Explored in Two Genera of Catapyrenioid Lichens (Verrucariaceae, Ascomycota) from the Deserts of China
Source: MDPI journal article supplement (doi:10.3390/jof8070729), 2022-07-13
Supplement: s1 [file s1]

**Table S1.** Specimens used for DNA extraction and GenBank accession number of all samples used in this study

| Species                                           | Voucher information               | GenBank Accession numbers |                 |
|---------------------------------------------------|-----------------------------------|---------------------------|-----------------|
|                                                   |                                   | ITS                       | nu LSU          |
| <i>C. lacinulatum</i> 1                           | —                                 | —                         | EF643762        |
| <i>C. lacinulatum</i> 2                           | —                                 | EF469155                  | EF469158        |
| <i>C. lacinulatum</i> 3                           | M. Prieto 552                     | GU228960                  | GU228913        |
| <b><i>C. lacinulatum</i></b>                      | <b>20210302 (HMAS-L 153959)</b>   | <b>ON685892</b>           | <b>ON678147</b> |
| <b><i>C. lacinulatum</i></b>                      | <b>20210307 (HMAS-L 153961)</b>   | <b>ON685893</b>           | <b>ON678148</b> |
| <b><i>C. lacinulatum</i></b>                      | <b>20210274 (HMAS-L 153956)</b>   | <b>ON685894</b>           | <b>ON678146</b> |
| <b><i>C. lacinulatum</i></b>                      | <b>20210499 (HMAS-L 153954)</b>   | <b>ON685895</b>           | <b>ON678150</b> |
| <b><i>C. lacinulatum</i></b>                      | <b>20210436 (HMAS-L 151942)</b>   | <b>ON685896</b>           | <b>ON678149</b> |
| <b><i>C. lacinulatum</i></b>                      | <b>20201529 (HMAS-L 153781)</b>   | <b>ON685897</b>           | —               |
| <b><i>C. lacinulatum</i></b>                      | <b>20210273 (HMAS-L 153955)</b>   | <b>ON685898</b>           | —               |
| <b><i>C. lacinulatum</i></b>                      | <b>20210283 (HMAS-L 153957)</b>   | <b>ON685899</b>           | —               |
| <b><i>C. lacinulatum</i></b>                      | <b>20210299 (HMAS-L 153962)</b>   | <b>ON685900</b>           | —               |
| <b><i>C. lacinulatum</i></b>                      | <b>20210300 (HMAS-L 153958)</b>   | <b>ON685901</b>           | —               |
| <b><i>C. lacinulatum</i></b>                      | <b>20210306 (HMAS-L 153960)</b>   | <b>ON685902</b>           | —               |
| <b><i>C. lacinulatum</i></b>                      | <b>QX20200026 (HMAS-L 153953)</b> | <b>ON685903</b>           | —               |
| <i>C. lacinulatum</i> var. <i>atrans</i> 1        | M. Prieto 1703                    | GU228957                  | GU228910        |
| <i>C. lacinulatum</i> var. <i>atrans</i> 2        | M. Prieto 1702                    | GU228958                  | GU228912        |
| <i>C. lacinulatum</i> var. <i>erythrostratum</i>  | ARIZ 551162                       | GU228965                  | —               |
| <i>C. aff. lacinulatum</i> var. <i>latisporum</i> | M. Prieto 1704                    | GU228959                  | GU228911        |
| <i>C. lacinulatum</i> var. <i>latisporum</i> 1    | ARIZ 551304                       | —                         | GU228933        |
| <i>C. lacinulatum</i> var. <i>latisporum</i> 2    | ARIZ 551314                       | —                         | GU228934        |
| <i>C. pseudorufescens</i> 1                       | LI 127885                         | GU228963                  | GU228945        |
| <i>C. pseudorufescens</i> 2                       | LI 566404                         | GU228966                  | GQ344563        |
| <i>C. semaforonense</i>                           | M. Prieto 63                      | GU228961                  | GU228930        |
| <b><i>C. sinense</i> sp. nov.</b>                 | <b>20210245 (HMAS-L 153946)</b>   | <b>ON712842</b>           | <b>ON712829</b> |
| <b><i>C. sinense</i> sp. nov.</b>                 | <b>20210246 (HMAS-L 153947)</b>   | <b>ON712843</b>           | <b>ON712830</b> |
| <i>Placidium acrosporoides</i>                    | —                                 | —                         | EF643760        |
| <i>P. adami-borosi</i> 1                          | Aptroot S/N                       | GU228985                  | GU228936        |
| <i>P. adami-borosi</i> 2                          | LI 285591                         | GU228986                  | GU228942        |
| <i>P. aff. andicola</i>                           | LI 512226                         | GU228983                  | GU228941        |
| <i>P. arboreum</i> 1                              | COLO 479327                       | GU228995                  | —               |
| <i>P. arboreum</i> 2                              | AFTOL-ID 2285                     | —                         | EF643765        |
| <i>P. arboreum</i> 3                              | CG 579                            | KY769559                  | —               |
| <i>P. deosaiense</i> 1                            | LAH36819                          | MW653287                  | MW653270        |
| <i>P. deosaiense</i> 2                            | LAH36822                          | MW653290                  | MW653273        |
| <i>P. fingen</i> s                                | LI 271006                         | GU228989                  | GU228935        |
| <i>P. imbecillum</i> 1                            | LI 364261                         | GU228979                  | GU228940        |
| <i>P. imbecillum</i> 2                            | M. Prieto 664                     | GU228980                  | —               |
| <i>P. aff. lachneoides</i>                        | M. Prieto 564                     | GU228972                  | GU228906        |
| <i>P. lachneum</i> 1                              | Leavitt 18-619                    | MZ244187                  | —               |
| <i>P. lachneum</i> 2                              | Leavitt 18-577                    | MZ244185                  | —               |
| <i>P. lachneum</i> 3                              | M. Prieto 322                     | —                         | GU228926        |

|                                              |                                   |                 |                 |
|----------------------------------------------|-----------------------------------|-----------------|-----------------|
| <i>P. lachneum</i> 4                         | AFTOL-ID 2286                     | —               | EF643761        |
| <i>P. lachneum</i> var. <i>oleosum</i>       | M. Prieto 105                     | GU228981        | GU228929        |
| <b><i>P. nitidulum</i> sp. nov.</b>          | <b>20210560 (HMAS-L 151947)</b>   | <b>ON712844</b> | <b>ON712835</b> |
| <b><i>P. nitidulum</i> sp. nov.</b>          | <b>20210552 (HMAS-L 151946)</b>   | <b>ON712845</b> | <b>ON712833</b> |
| <b><i>P. nitidulum</i> sp. nov.</b>          | <b>20210421 (HMAS-L 151962)</b>   | —               | <b>ON712834</b> |
| <i>P. norvegicum</i>                         | M. Prieto 330                     | GU228973        | GU228904        |
| <i>P. pilosellum</i> 1                       | M. Prieto 439                     | GU228968        | GU228907        |
| <i>P. pilosellum</i> 2                       | M. Prieto 3                       | GU228993        | GU228925        |
| <i>P. pilosellum</i> 3                       | M. Prieto 128                     | GU228967        | —               |
| <i>P. podolepis</i>                          | LI 297365                         | GU228956        | GU228917        |
| <i>P. rufescens</i> 1                        | M. Prieto 10                      | GU228970        | GU228931        |
| <i>P. rufescens</i> 2                        | M. Prieto 164                     | GU228971        | GU228914        |
| <i>P. squamulosum</i> 1                      | M. Prieto 339                     | —               | GU228928        |
| <i>P. squamulosum</i> 2                      | M. Prieto 336                     | GU228994        | —               |
| <i>P. squamulosum</i> var. <i>argentinum</i> | M. Prieto 1705                    | GU228991        | GU228922        |
| <i>P. subrufescens</i>                       | Aragón 33/04                      | GU228974        | GU228903        |
| <i>P. tenellum</i>                           | MA 16300                          | —               | GQ344562        |
| <b><i>P. tumidulum</i> sp. nov.</b>          | <b>20210535 (HMAS-L 153951)</b>   | <b>ON712848</b> | <b>ON712831</b> |
| <b><i>P. tumidulum</i> sp. nov.</b>          | <b>20210524 (HMAS-L 151966)</b>   | <b>ON712849</b> | <b>ON712832</b> |
| <b><i>P. tumidulum</i> sp. nov.</b>          | <b>20210606 (HMAS-L 151967)</b>   | <b>ON712858</b> | <b>ON712836</b> |
| <b><i>P. tumidulum</i> sp. nov.</b>          | <b>20210523 (HMAS-L 151965)</b>   | <b>ON712852</b> | —               |
| <b><i>P. tumidulum</i> sp. nov.</b>          | <b>20201384 (HMAS-L 153732)</b>   | <b>ON712846</b> | —               |
| <b><i>P. tumidulum</i> sp. nov.</b>          | <b>20201486 (HMAS-L 153786)</b>   | <b>ON712847</b> | —               |
| <b><i>P. tumidulum</i> sp. nov.</b>          | <b>20210666 (HMAS-L 151952)</b>   | <b>ON712850</b> | —               |
| <b><i>P. tumidulum</i> sp. nov.</b>          | <b>20210516 (HMAS-L 151944)</b>   | <b>ON712851</b> | —               |
| <b><i>P. tumidulum</i> sp. nov.</b>          | <b>20210522 (HMAS-L 151945)</b>   | <b>ON712857</b> | —               |
| <b><i>P. tumidulum</i> sp. nov.</b>          | <b>20210534 (HMAS-L 153950)</b>   | <b>ON712853</b> | —               |
| <b><i>P. tumidulum</i> sp. nov.</b>          | <b>20210461 (HMAS-L 151963)</b>   | <b>ON712860</b> | —               |
| <b><i>P. tumidulum</i> sp. nov.</b>          | <b>20210746 (HMAS-L 151941)</b>   | <b>ON712859</b> | —               |
| <b><i>P. tumidulum</i> sp. nov.</b>          | <b>XL2017267 (HMAS-L 140940)</b>  | <b>ON712856</b> | —               |
| <b><i>P. tumidulum</i> sp. nov.</b>          | <b>ALS2018040 (HMAS-L 153952)</b> | <b>ON712855</b> | —               |
| <b><i>P. tumidulum</i> sp. nov.</b>          | <b>ALS2018022 (HMAS-L 143913)</b> | <b>ON712854</b> | —               |
| <i>P. umbrinum</i> 1                         | LI 350628                         | GU228962        | GU228924        |
| <i>P. umbrinum</i> 2                         | AFTOL-ID 2274                     | —               | EF643749        |
| <b><i>P. varium</i> sp. nov.</b>             | <b>20210692 (HMAS-L 151956)</b>   | <b>ON712861</b> | <b>ON712838</b> |
| <b><i>P. varium</i> sp. nov.</b>             | <b>20210698 (HMAS-L 151958)</b>   | <b>ON712863</b> | <b>ON712839</b> |
| <b><i>P. varium</i> sp. nov.</b>             | <b>20210725 (HMAS-L 151969)</b>   | <b>ON712864</b> | <b>ON712840</b> |
| <b><i>P. varium</i> sp. nov.</b>             | <b>20210696 (HMAS-L 151957)</b>   | <b>ON712862</b> | —               |
| <b><i>P. varium</i> sp. nov.</b>             | <b>20210576 (HMAS-L 153948)</b>   | <b>ON712865</b> | —               |
| <b><i>P. varium</i> sp. nov.</b>             | <b>20210689 (HMAS-L 151955)</b>   | <b>ON712866</b> | —               |
| <b><i>P. varium</i> sp. nov.</b>             | <b>20210676 (HMAS-L 151953)</b>   | <b>ON712867</b> | —               |
| <b><i>P. varium</i> sp. nov.</b>             | <b>20210639 (HMAS-L 153949)</b>   | <b>ON712868</b> | —               |
| <b><i>P. varium</i> sp. nov.</b>             | <b>20210599 (HMAS-L 151948)</b>   | <b>ON712869</b> | —               |
| <b><i>P. varium</i> sp. nov.</b>             | <b>20210608 (HMAS-L 151949)</b>   | <b>ON712870</b> | —               |
| <b><i>P. varium</i> sp. nov.</b>             | <b>20210623 (HMAS-L 151951)</b>   | <b>ON712871</b> | —               |

|                                           |                          |          |          |
|-------------------------------------------|--------------------------|----------|----------|
| <i>P. varium</i> sp. nov.                 | 20210716 (HMAS-L 152816) | ON712872 | —        |
| <i>P. varium</i> sp. nov.                 | 20210611 (HMAS-L 151940) | ON712873 | —        |
| <i>P. varium</i> sp. nov.                 | 20210751 (HMAS-L 151970) | —        | ON712841 |
| <i>P. velebiticum</i> 1                   | LI 297363                | GU228975 | GU228921 |
| <i>P. velebiticum</i> 2                   | LI 285722                | GU228977 | GU228938 |
| <i>P. yoshimurae</i>                      | LI 316277                | GU228984 | GU228905 |
| <i>Heteroplacidium acervatum</i> 1        | LI 271015                | GU228954 | GQ344564 |
| <i>H. acervatum</i> 2                     | M. Prieto 399            | GU228955 | GU228932 |
| <i>H. compactum</i> 1                     | M. Prieto 1607           | GU228949 | GU228916 |
| <i>H. compactum</i> 2                     | M. Prieto 1701           | GU228952 | GU228918 |
| <i>H. congeatum</i> 1                     | LI 552268                | GU228950 | GU228920 |
| <i>H. congeatum</i> 2                     | LI 297536                | GU228951 | GU228919 |
| <i>H. contumescens</i>                    | —                        | —        | EF643755 |
| <i>H. divisum</i>                         | LI 218468                | GU228953 | GU228915 |
| <i>H. fuscula</i>                         | AFTOL-ID 2255            | —        | EF643793 |
| <i>H. imbricatum</i>                      | —                        | —        | EF643756 |
| <i>Placopyrenium bucekii</i> 1 (outgroup) | —                        | EU010245 | EF643767 |
| <i>Pl. bucekii</i> 2 (outgroup)           | —                        | EU010246 | EF643768 |
| <i>Pl. canellum</i> 1 (outgroup)          | —                        | —        | EF643784 |

Notes: Newly generated sequences are in bold font. '—' indicates that the corresponding information or sequence is absent.

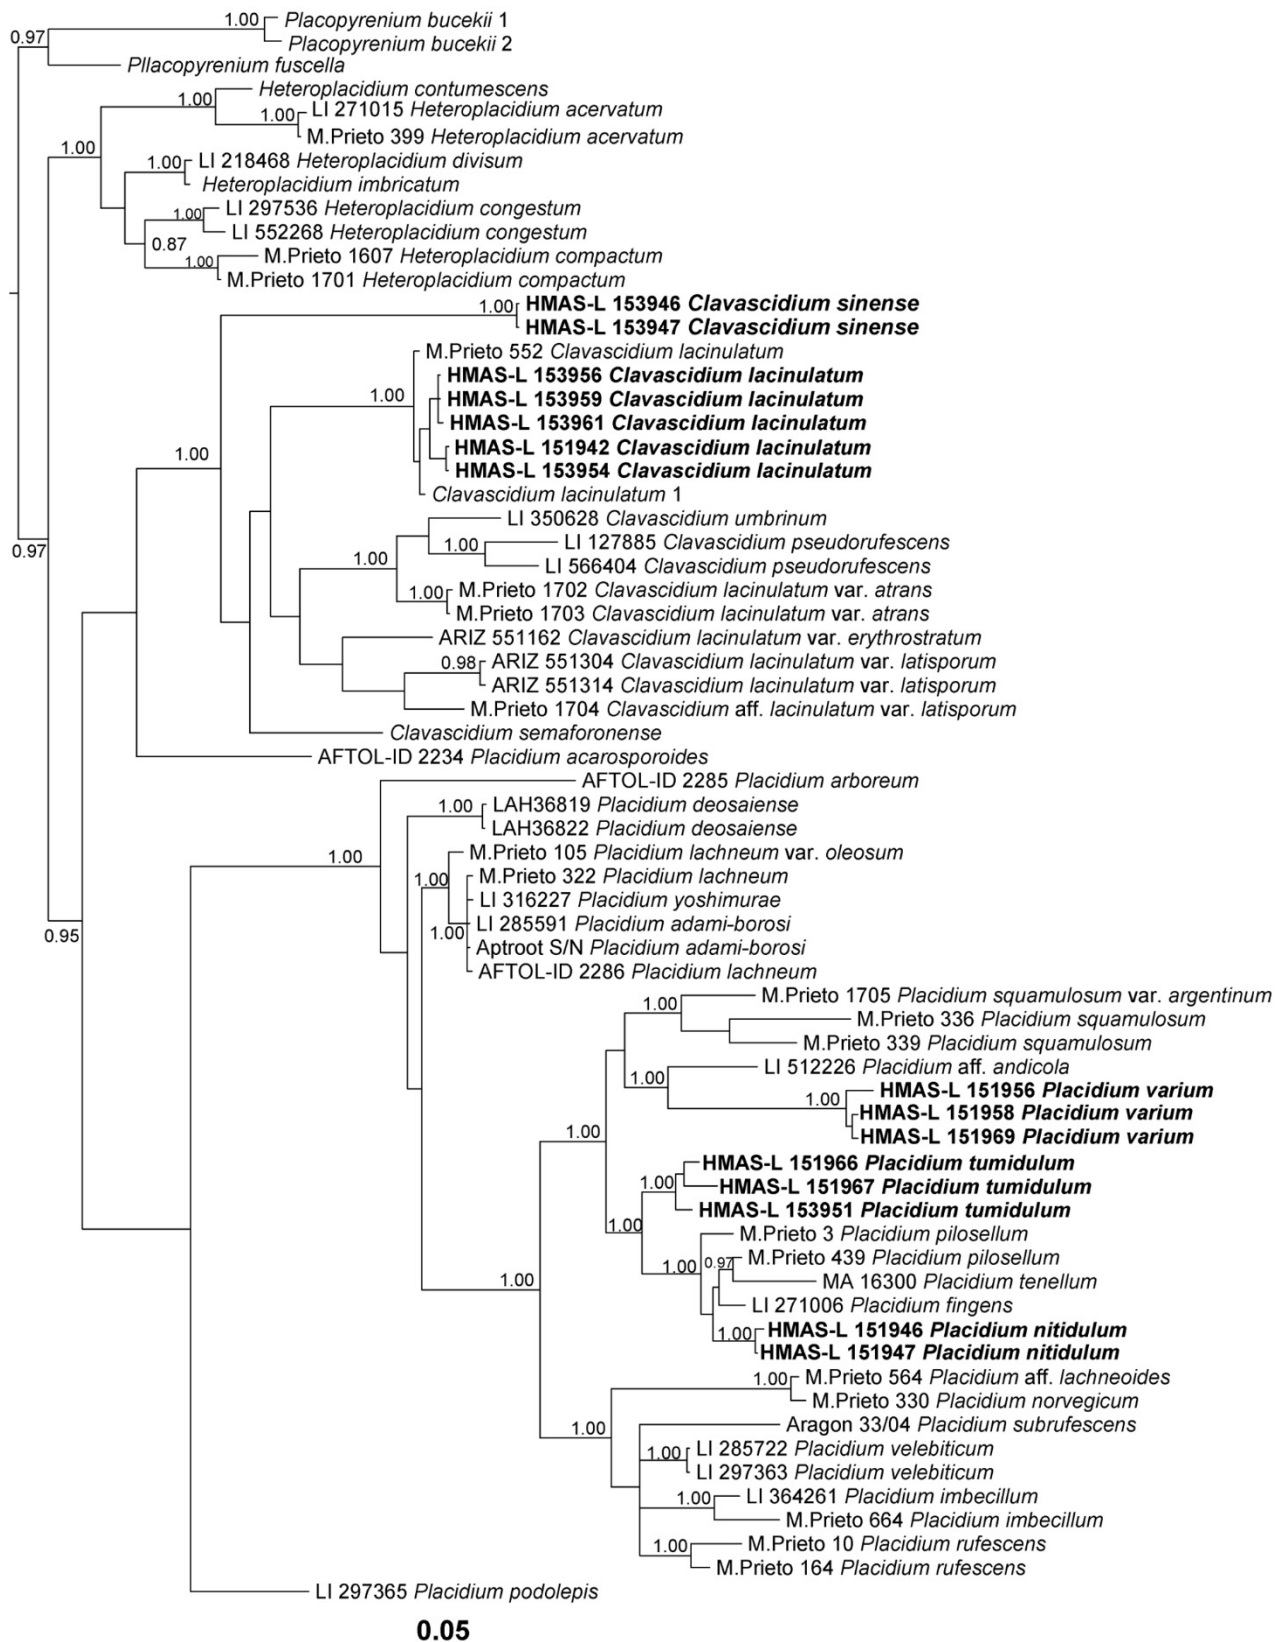

**Figure S1.** The Bayesian tree based on the concatenated ITS + nuLSU data sets. The numbers in each node represent posterior probability (PP) values. PP values  $\geq 0.95$  were plotted on the branches of the tree. The samples in bold indicate that these sequences were newly generated for this study. Scale in 0.05 substitution per site.

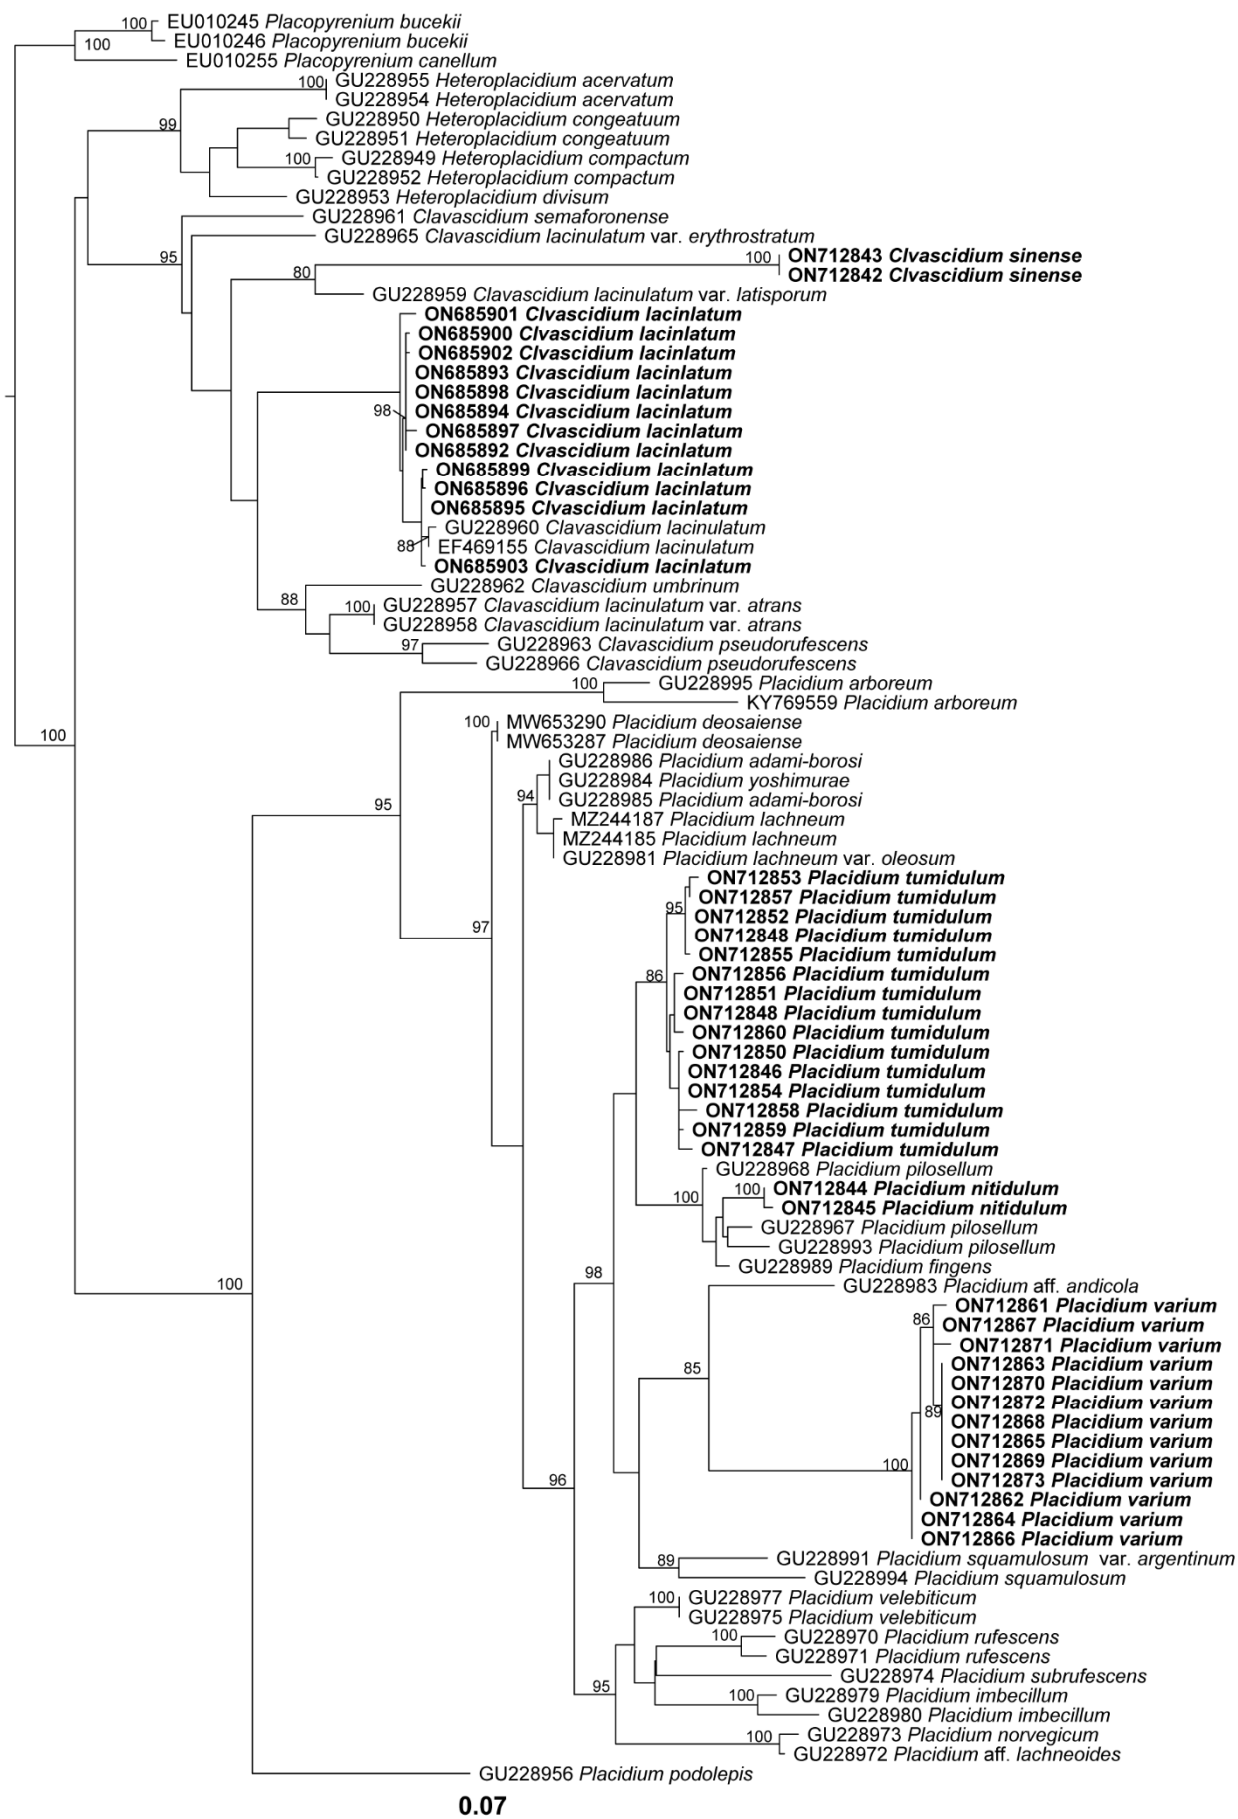

**Figure S2.** The maximum likelihood tree based on the ITS data set. The numbers in each node represent bootstrap support (BS)

values. BS values  $\geq 75\%$  were plotted on the branches of the tree. The samples in bold indicate that these sequences were newly generated for this study. Scale in 0.07 substitution per site.

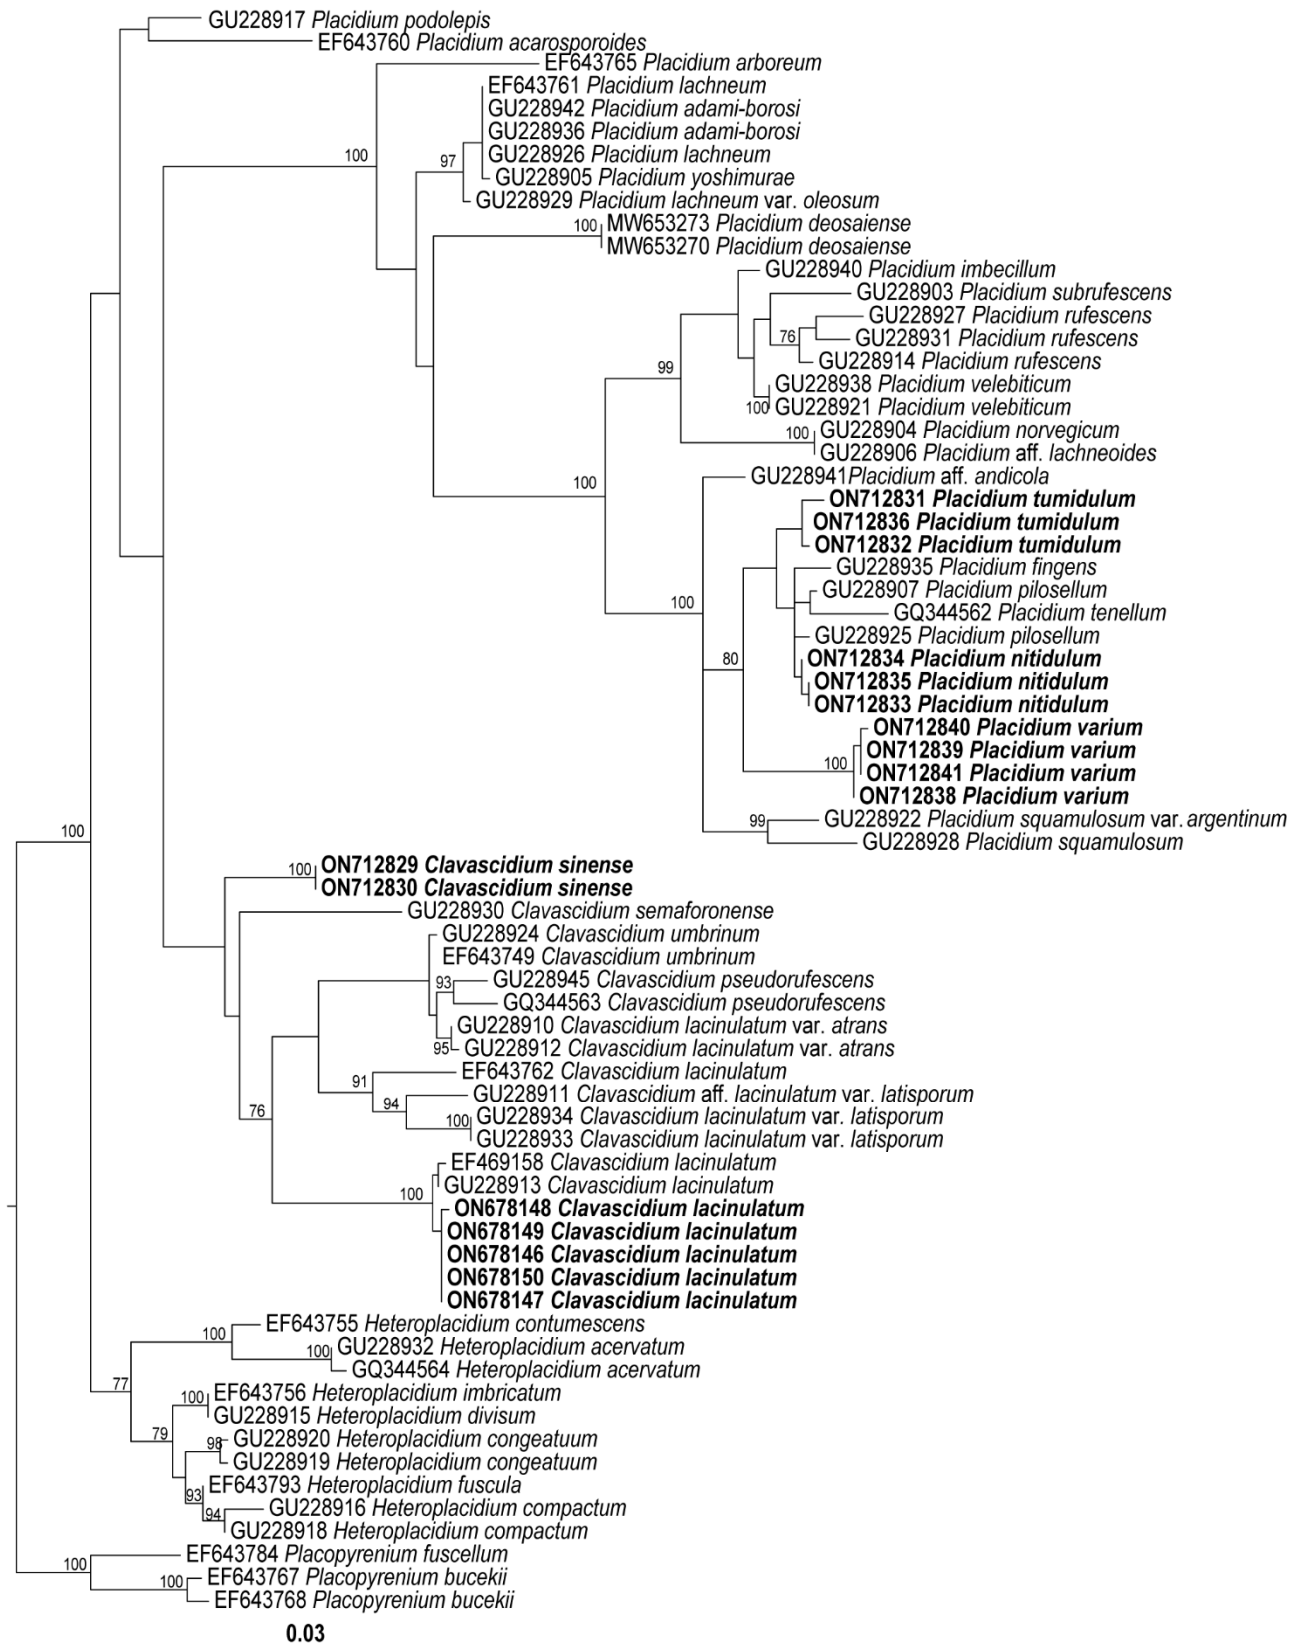

**Figure S3.** The maximum likelihood tree based on the LSU data set. The numbers in each node represent bootstrap support (BS) values. BS values  $\geq 75\%$  were plotted on the branches of the tree. The samples in bold indicate that these sequences were newly generated for this study. Scale in 0.03 substitution per site.
